# Supplementary material for: Splenic T2 signal intensity loss on MRI is associated with disease burden in multiple myeloma
Source: Springer Nature journal article supplement (doi:10.1007/s00330-024-11191-8), 2024-11-27

# **Splenic T2 signal intensity loss on MRI is associated with disease burden in multiple myeloma**

## **ELECTRONIC SUPPLEMENTARY MATERIAL**

**Supplement Table 1:** Imaging parameters

|                                          | <b>T1-weighted TSE</b> | <b>T2-weighted STIR</b>       | <b>TSE</b> | <b>Diffusion-weighted imaging</b>   |
|------------------------------------------|------------------------|-------------------------------|------------|-------------------------------------|
| Sequence                                 | 2D TSE                 | 2D TSE STIR                   |            | Diffusion-EPI iShim                 |
| Plane                                    | coronal                | coronal                       |            | axial                               |
| Slice thickness, distance factor         | 5.0mm, 10%             | 5.0mm, 10%                    |            | 6.0mm, 0%                           |
| In-plane resolution (interpolation)      | 1.3mm x 1.3mm          | 0.7mm x 0.7mm (interpolated)  |            | 1.8mm x 1.8mm (interpolated)        |
| FOV/acquisition matrix                   | 375mmx500mm / 432x768  | 352mmx470mm / 360x640         |            | 287mmx460mm / 160x256               |
| Number of stations (whole-body / pelvis) | 5/1                    | 5/1                           |            | 5/2                                 |
| Coverage in z-axis per station           | 375mm                  | 353mm                         |            | 228mm                               |
| Acquisition time per station             | 1min 43s               | 1min 7s                       |            | 2min 49s                            |
| Parallel imaging                         | GRAPPA (Ac.-f. 2)      | GRAPPA (Ac.-f. 3)             |            | GRAPPA (Ac.-f. 2)                   |
| TR/TE/NSA                                | 528ms/8.4ms/1          | 3650ms/56ms/1                 |            | 5130ms/64ms/1                       |
| Flip angle                               | 150°                   | 140°                          |            | 90°                                 |
| Fat suppression technique                | -                      | slice-selective IR (TI=160ms) |            | slice-selective IR (TI=180ms)       |
| B-values                                 | -                      | -                             |            | b values: 50/800 s mm <sup>-2</sup> |

Abbreviations: TSE: turbo spin echo; STIR: short-TI inversion recovery; DWI: diffusion-weighted imaging; EPI: echo-planar imaging; iShim: integrated slice-specific dynamic shimming; FOV: field of view; GRAPPA: Generalized Auto-calibrating Partially Parallel Acquisitions; Ac.-f.: acceleration factor. TR: repetition time; TE: echo time; NSA: number of signal averages; IR: inversion recovery, TI: inversion time.

**Supplement Figure 1:** Bland-Altman plots for mean T2-TSE and DWI (b50) signal intensity.

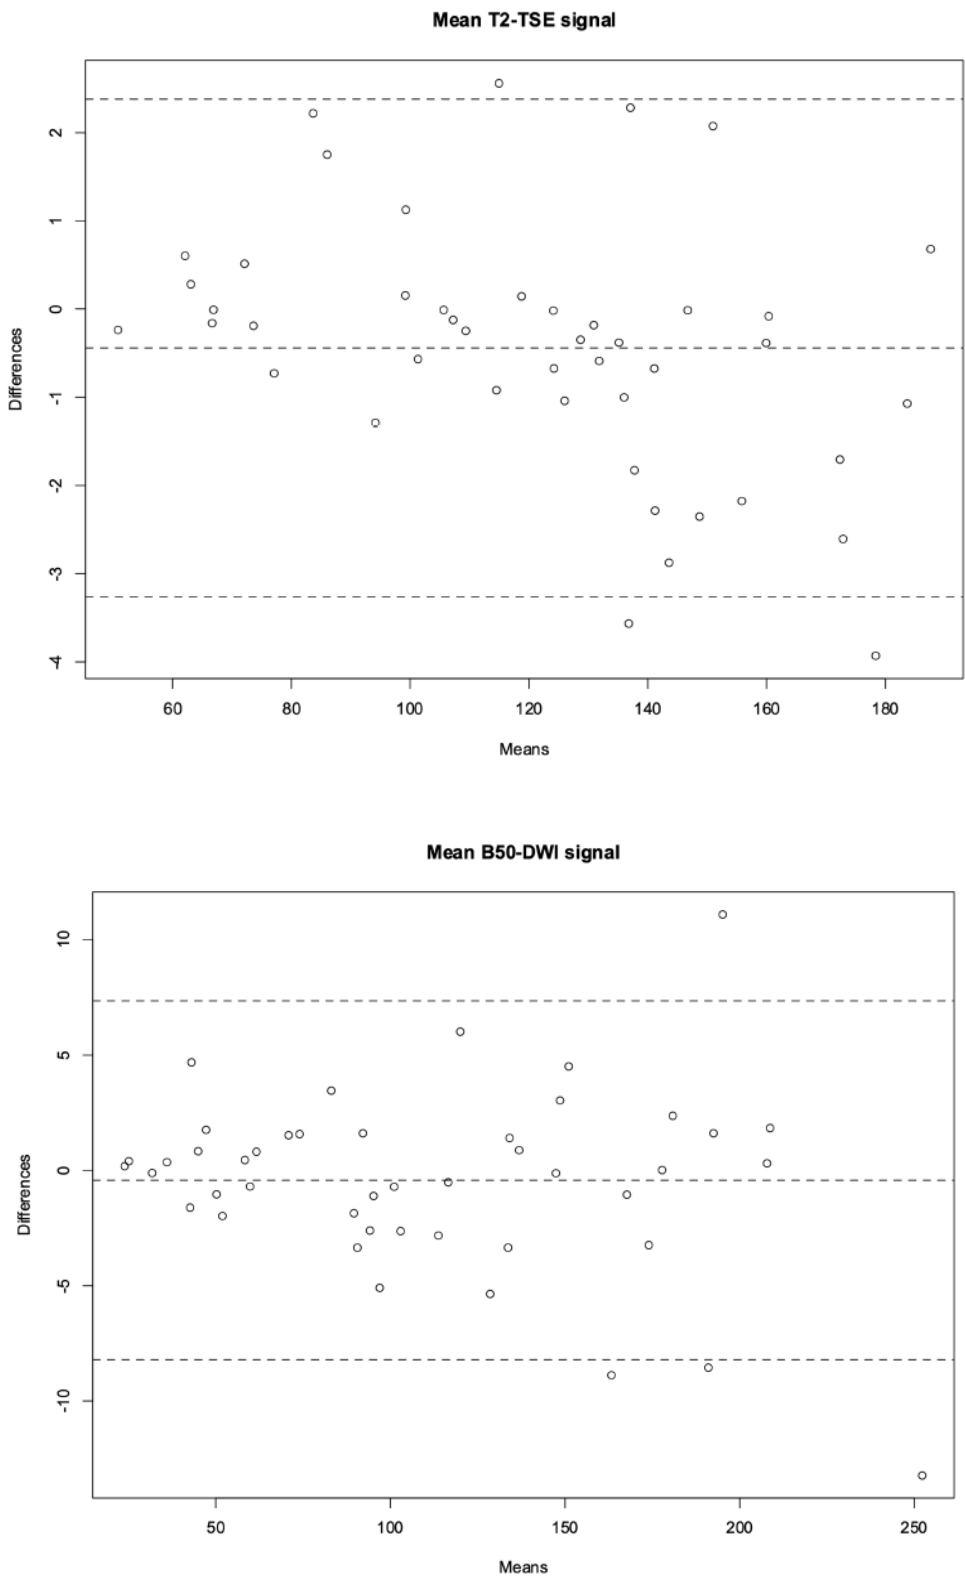

Supplement: MOESM1 [file 330_2024_11191_MOESM1_ESM.pdf]
